# Supplementary material for: Cell competition removes segmental aneuploid cells from Drosophila imaginal disc-derived tissues based on ribosomal protein gene dose
Source: eLife. 2021 Apr 13;10:e61172. doi: 10.7554/eLife.61172 (PMC8043752; doi:10.7554/eLife.61172)
Supplement: Figure 1—source data 1. [file elife-61172-fig1-data1.xlsx]

## Sheet: Sheet1
Source Data File 1, related to Figure 1
Figure 1H (500Rad + 4h)		genotype			Figure 1M (4000Rad + 24h)			genotype			Figure 1P (4000Rad + 24h)		p53[-/-]				rpS12[97D] p53[-/-]			Figure 1R (1000Rad)
	w[11-18]	rpS12[97D]	p53[-/-]			p53[-/-]	rpS12[97D] p53[-/-]	rpS12[97D] p53[-/-]	rpS12[97D] p53[-/-]			wing pouch area (px)	Xrp1+ cells/wing pouch	Xrp1+ cells/px		wing pouch area (px)	Xrp1+ cells/wing pouch	Xrp1+ cells/px			w[11-18]	rpS12[97D]	p53[-/-]	rpS12[97D] p53[-/-]
dying cells/wing pouch	388	398	14					P{rpS12[+]}	P{rpS12[D97]}		Xrp1+ cells/px	27709	77	0.00277888		29309	76	0.00259306		Minute bristles/100 flies	6	8	15	18
	259	363	10		dying cells/wing pouch	435	55	368	76			29325	109	0.00371697		24662	34	0.00137864			4	6	20	20
	376	299	13			469	63	428	65			30368	110	0.00362223		27591	29	0.00105107			5	4	15	22
	265	228	9			298	47	376	35			21359	128	0.00599279		20042	44	0.00219539
	473	498	6			400	42	352	44			25317	134	0.00529289		33198	60	0.00180734
	412	349	7			301	38	301	32			27681	97	0.00350421		31501	25	0.000793626
						466	45	345	96			40662	187	0.00459889		21134	20	0.000946342
						389	39	388	23			20665	91	0.00440358		28586	47	0.00164416
						326	36	410	38			15945	69	0.00432738		36636	40	0.00109182
						330	65	308				21477	106	0.00493551		28891	36	0.00124606
						438	62					26499	97	0.00366052		27217	63	0.00231473
							325					23718	94	0.00396323		20358	57	0.00279988
							288					15429	89	0.00576836		21541	64	0.00297108
							612					19134	89	0.00465141		22311	73	0.00327193
												21456	74	0.00344892		27229	54	0.00198318
												31258	156	0.00499072		20668	81	0.0039191
												34896	154	0.00441311		13199	58	0.00439427
												32675	147	0.00449885		20942	16	0.000764015
												27095	130	0.00479793		30534	17	0.000556756
												27747	132	0.00475727		30872	55	0.00178155
												20350	117	0.00574939		46161	31	0.000671563
												24344	148	0.00607953		29606	57	0.00192529
												21804	98	0.00449459		33624	46	0.00136807
												16105	87	0.00540205		27510	73	0.00265358
												20910	108	0.00516499		27569	39	0.00141463
												23460	141	0.00601023		24655	52	0.00210911
												23650	139	0.00587738
												23706	95	0.00400742
												22750	68	0.00298901
												26376	129	0.00489081
												23537	112	0.00475847
												24568	98	0.00398893
												35953	77	0.00214168
