# Supplementary material for: Cell competition removes segmental aneuploid cells from Drosophila imaginal disc-derived tissues based on ribosomal protein gene dose
Source: eLife. 2021 Apr 13;10:e61172. doi: 10.7554/eLife.61172 (PMC8043752; doi:10.7554/eLife.61172)
Supplement: Figure 3—source data 1. — * indicates that 4x w+ cells indicative of FLP-mediated duplication were also observed in this specimen. Gaps between measurements separate replicate data. [file elife-61172-fig3-data1.xlsx]

## Sheet: Sheet1
	Figure 3 Source File 1. % eye white data. * indicates that 4x w+ cells indicative of FLP-mediated duplication were also observed in this speciment
	gaps between measurements separate replicates
26A1-28C3	26A1-28C3	26A1-29F8	26A1-29F8	48B2-50C1	48B2-50C1	48F6-50C1	48F6-50C1	56F16-58E2	56F16-58E2	56F16-59B1	56F16-59B1	63A3-65A9	63A3-65A9	63A3-65F5	63A3-65F5	FRT82	FRT82	63C1-65A9	63C1-65A9	63C1-65F5	63C1-65F5	63C1-67B2	63C1-67B2	87B8-89B16	87B8-89B16	87B8-89E5	87B8-89E5	87B8-93A2.2	87B8-93A2.2	89B13-93A2.1	89B13-93A2.1	89B13-93A2.2	89B13-93A2.2
FRT82	FRT82	FRT82	FRT82	FRT82	FRT82	FRT82	FRT82	FRT82	FRT82	FRT82	FRT82	FRT82	FRT82	FRT82	FRT82	male	female	FRT82	FRT82	FRT82	FRT82	FRT82	FRT82 Xrp1	FRT82	FRT82	FRT82	FRT82	FRT82	FRT82	FRT82	FRT82	FRT82	FRT82
male	female	male	female	male	female	male	female	male	female	male	female	male	female	male	female	0	0	male	female	male	female	female	male	male	female	male	female	male	female	male	female	male	female
4	0	0	0	0	0	26	47	81	29	2	0	0	0	32	23	0	0	45	5	5	2	9	2	0	2	2	0	0	0	0	9*	28	18
6	0	5	0	0	0	18	42	52	43	0	0	0	0	13	0	0	0	43	9	0	0	12	8	0	0	0	3	6	0	4	8	12	9
2	0	5	0	1	0	6	23	63	38	0	0	3	5	7	0	0	0	39	45	4	16	0	0	0	3	0	0	2	0	21	22	4*	3
16	0	9	0	0	0	14	24	41	21	0	0	2	0	44	0	0	0	45	12	16	11	0	0	0	2	0	0	2	0	2	8	16	2
13	0	12	0	0	0	36	24	45	57	0	0	13	0	28	4	0	0	53	38	5	4	0	0	0	11	1	5	0	0	21	2	3	4
4	4	4	0	0	0	26	36	53	16	0	0	5	31	23	5		0	31	34	0	27	0	2	0	4	0	0	0	0	8	5	32	4
41	6	9	0	0	2		12*	13	71	0	0	2	12	0	2		0	38	28	18	15	0	24		24	2	0	8	2	11	3	11	23
17	11	4	0	0	0*	7	6	55	46	0	0	1	2	1	0		0	76	14	0	2	0	3	4	18	0	0	6	1	19	2*	9	1
6	0	5	0	0	0	9	26	32	31	0	0	1	16	27	2		0	16	31	42	0	0		0	0	0	3	1	0*	4	24*	18	2
0	9	16	0	0	0*	8	5	17	29	0	0	35	45	68	0		0	22	42	0	0	0	0	5	3	1	2	1	8	7	6	0*	24
3	5	0	0	0	0	28	26	3	34	0	0		5	9	3		0			0	0	0	0	1			0	0	0	4	3	16	6
3	0	6	0	0	0	7*	6	17	4	0	0	13	4	7	0		0	36	97	0	0	0	2	1	0	0	0	0	0	7	5	15	4
6	9		0	1	2	16*	27	2	68	0	0	12	26	32	0		0	35	48	0	0	0	3	1	0	0	7	4	0	11	5	9*	9
0	0	0	0	1	0	16*	28	0	44	0	0	5	26	4	0		0	38	93	0	0	4	15		0	0	4	0	1	5	15	11*	4*
9	2	8	5	0	0	34*	34	16	27	0	0	2		5	0		0	42	69	0	0	0	0		2	3	0	3	0	0	8	6	3
23	2	9	2	0	0	15	35	14	28	0	0	35	0	26	3		0	55	45	0	0	0	1		2	0	0	1	0	3	16	9	2
21	0	14	0			9*		65	71	0		15	1	0			0	27	51	0	0	0	1		0	3	3
17	1	5	0				67	52	73	0	0	2	1	16	0		0	62	7	0	0	2	1		2	2	0	2	0	4	23	6*	56
2	2	0	0			19*	45	18	41		0	3	0	4	0		0	89	16	0	0	0	0		0	0	0	6	4	1	12	1*	37
14	2	6	0			12*	28	68	16	0	0	4	4	8	0		0	65	54	0	0	0	0		3	0		2	0	5	35	11	12
5	45	3	0			11	38	28		0	0	26	1	0	0		0	45	72		0	0	0		0	0	19	8	0	6	9	8	22
1	1	6	0			27	21	65	16	0	0	4	0	0	0		0	42	65	2	0	0	1		1	4	8	8	2	1*	5	4	32
12	1	5				5	41	6	11	0	0	6	1	8	0		0	28	46	1		12	0		0	2	3	4	0	2	8	5	2*
2	2	3	0*			14	35	5	6	7	0	1	0	1	4		0	45	97	2	14	0	8		0	3	5	0	5	4	9	12	4
5	34	9	4			17*	11	13	3	0*	0	5	0		3		0	11	94	1	0	0	6		0	3	0	0	2	3	7	19	6*
28	2		0			26*		64	17	0	0	2	0	0	0		0		63	15	28	0	14			1	0	0	0	7	0	14	13
15	1		0			6*	9	8	24	0	0	4	0	16	1		0		9	3	2	0	12			0	0	1	0	14	1	9	17*
13	4		0			12*	36	35	15	0	0	13	2	0	0		0		38	0	4	0	0			2	1	0	8	8	1	4	1
9	1		0				96	68	5	0	0	5	0	1	0		0		7	0	0		4			0	1	21	15	9	1	22	0
17	1		4			5	53	36	62	0	0	12	23	5	0		0		71	1	0	0	0			2	1	4	0	17	4	8	2
0	4		13			65	21		71	0	0	8	6	67	3		0		27	0	6	0	0			0	9	5	0	9	5	12*	3
0	1		0			23	19	23	5	0		11	0	42	1		0			1	9	0				2	6	0	0	5	9	0	16
	4		0			13	57	35	11	0		3	0	4	0		0		96	1	0	0				1	0	0	0	2	7	9	16
14	3		0			2*	6	8		0		0	1	28	0		0		91	6	0	0				2	4
7	5		0			45*	86	24		0		1	0	8	0		0		32	2	1	0				0	0
3	5		0			5	77	61				9	1	22			0		83	0	0	0				1	2
2	23		0			46	18	88				4	1	0			0		13	0	0	0				0	1
17	26		4			7	12	85				1	12	1					31	0	0	0				0	2
14	2		0			6		72				0	0	24					68	0	0	0				0	9
15	0		0			22	4					2	13	6					27	5	0	0				0	6
6*			0			12*	14					3	5	0					68	0	0	0				0	1
1	3*					4	24					5	1	4					15	0	0	0				0	0
14	0					7	14					16	0	1					57	0	0	0				2	0
2	6					4*	65					1	3	15					83	12	0	0				0	0
6	4					1	8					4	1	0					13	6	0	0				0	0
19	7						6					4	2						41	1	0	0				1	0
0	2						72					3	1						96	0	0	0				2	0
8	24						24					3	0						99	0	0	0				1	1
21	2						57					3	1							0	0	0				2	0
9	46						64					2	0							0	0	0					0
5	27						78					5	1							0	0	0				7	0
35	19						16						1							16	0	0				4	1
5	55						43						0							42	0	0				0	0
8	14												36							2	0	0				0	1
3	8												15							4	0	0				1	0
	0												0							23	1	0				0	0
	0												0							3	13	0				2	0
	68												2							1	18	0				6	0
	14												0							0	0	0				2	1
													0							2	0	0				4	2
													9							5	1	0				1	0
													0							0	0	0				0	2
													0							0	0	0				3	2
													1							0	0	0				0	4
													0							0	0	0				0	0
													0							38	5	0				0	0
													0							6	0	0				0	0
													1							32	0	0				0	0
													0							4	0	0				0	0
													4							0	0	0				1	2
													0							0	0	0				0	0
													0							3	0					1	0
													1							12	2					0	0
													0							0	0					0	0
													0							0	0						1
													0								0						11
													0							0	0						15
													6							0	0						6
													15							9	0						0
																				0	0						0
																					1						0
																					0						0
																					0						8
																					0						3
																					0						0
																					0						3
																					0
																					0						1
																					0						0
																					0						2
																					0						0
																											0
																					0						2
																					0						1
																					0						1
																					2						0
																					0						0
																					0						0
																					0						0
																					0						0
																					0						0
																					0						5
																					0						2
																					3
																					8
																					3
																					2
																					0
