# Supplementary material for: Cell competition removes segmental aneuploid cells from Drosophila imaginal disc-derived tissues based on ribosomal protein gene dose
Source: eLife. 2021 Apr 13;10:e61172. doi: 10.7554/eLife.61172 (PMC8043752; doi:10.7554/eLife.61172)
Supplement: Figure 4—source data 1. — * Indicates that 4x w+ cells indicative of FLP-mediated duplication were also observed in this specimen. Gaps between measurements separate replicate data. [file elife-61172-fig4-data1.xlsx]

## Sheet: Sheet1
Figure 4 Source File 1. % eye white data. * indicates that 4x w+ cells indicative of FLP-mediated duplication were also observed in this specimen
gaps between measurements separate replicates
63C1-65A9	63C1-65A9	63A3-65A9	63A3-65A9	63A3-65A9	63A3-65A9	87B8-89B16	87B8-89B16	87B8-89E5	87B8-89E5
FRT82	FRT82	CyO	CyO	P{RpL28+}	P{RpL28+}	TM6	P{eIF2𝜸+}	TM6	P{eIF2𝜸+}
male	female	male	female	male	female	female	female	female	female
45	5	0	0	0	5	5	22	3	9
43	9	0	0	13	13	4	16	1	6
39	45	0	0	22	16	13	35	2	6
45	12	0	0	26	22	9	65	2	11
53	38	0	0	26	24	3	47	0	9
31	34	0	0	31	34	15	67	0	7
38	28	1	0	34	45	6	55	2	16
76	14	1	0	35	48	6	41	1	24
16	31	1	0	37	48	5	77	14	16
22	42	1	0	37	48	11	64	6	5
		1	0	43	52	3	46	4	14
36	97	2	0	45	53	2	45	0	14
35	48	2	0	52	54			5	46
38	93	2	0	52	54			1	38
42	69	2	0	54	54			0	16
55	45	2	0	55	56			2	24
27	51	2	0	65	57			0	13
62	7	3	0	65	57			0	19
89	16	3	0	97	59			1	47
65	54	3	0	99	65			2	11
45	72	3	0	100	67			0	44
42	65	3	0	100	71			3	13
28	46	3	1		71			5	37
45	97	3	1		82			3	58
11	94	4	1		91			3	17
	63	4	1		91			2	7
	9	4	1		96			23	3
	38	4	1		99			5	4
	7	4	1					2	8
	71	5	2					4	4
	27	5	2					5	12
		6	3					0	15
	96	6	3					3	36
	91	8	3					7	34
	32	11	3					6	8
	83	15	3					5	26
	13	16	3					9
	31	35	3					3
	68		3
	27		4
	68		4
	15		6
	57		6
	83		6
	13
	41
	96
	99
