# Supplementary material for: Cell competition removes segmental aneuploid cells from Drosophila imaginal disc-derived tissues based on ribosomal protein gene dose
Source: eLife. 2021 Apr 13;10:e61172. doi: 10.7554/eLife.61172 (PMC8043752; doi:10.7554/eLife.61172)
Supplement: Figure 5—source data 1. — * Indicates that 4x w+ cells indicative of FLP-mediated duplication were also observed in this specimen. Gaps between measurements separate replicate data. [file elife-61172-fig5-data1.xlsx]

## Sheet: Sheet1
Figure 4 Source File 1. % eye white data. * indicates that 4x w+ cells indicative of FLP-mediated duplication were also observed in this specimen
gaps between measurements separate replicate samples
63A3-65A9	63A3-65A9	63A3-65A9	63A3-65A9	63C1-65A9	63C1-65A9	63C1-65A9	63C1-65A9	63C1-65F5	63C1-65F5	63C1-65F5	63C1-65F5	63A3-65A9	63A3-65A9	63A3-65A9	63A3-65A9	63C1-65A9	63C1-65A9	63C1-65A9	63C1-65A9	63C1-65F5	63C1-65F5	63C1-65F5	63C1-65F5
FRT80	FRT80	Df(3L)H99 FRT80	Df(3L)H99 FRT80	FRT80	FRT80	Df(3L)H99 FRT80	Df(3L)H99 FRT80	FRT80	FRT80	Df(3L)H99 FRT80	Df(3L)H99 FRT80	FRT82	FRT82	FRT82 Xrp1	FRT82 Xrp1	FRT82	FRT82	FRT82 Xrp1	FRT82 Xrp1	FRT82	FRT82	FRT82 Xrp1	FRT82 Xrp1
male	female	male	female	male	female	male	female	male	female	male	female	male	female	male	female	male	female	male	female	male	female	male	female
1*	0	2	6	23	26	28	7	4	0	1	2	0	0	43	56	45	5	56	17	5	2	28	31
0	0	1	3	88	71	62	9	0	7	0	0	0	0	27	52	43	9	71	7	0	0	49	22
0*	0	1	31	57	23	9	35	23	0	9	6	3	5	28	27	39	45	78	38	4	16	55	21
0	0	2	22	88	23	24	29	5	0	0	27	2	0	18	19	45	12	78	64	16	11	26	36
6	3	4	1	35	51	52	88	3	7	62	4	13	0	42	32	53	38	53	54	5	4	9	11
9	1	6	2*	58	14	32	64	16	0	52	2	5	31	23	35	31	34	56	67	0	27	10	6
2	2	18	1	53	12	11	12	0	4*	14	2	2	12	63		38	28	28	62	18	15	26	23
0*	2	9	4	19	36	9	2	0	0*	6	1	1	2	65	5	76	14	42	57	0	2	22	16
0	13		0	65	16	2	7	0	0	4	28	1	16	15	4	16	31	24	28	42	0	19	39
1	3	12	2	78	22	17	8	1	0	5	19	35	45	17	46	22	42	6	28	0	0	16	15
6	9	6	0	26	53	7	54	0	0	58	26		5	34	22			58	57	0	0	82	5
45	4	4	0*	12	65	34	61	1	0	52	46	13	4	31	6	36	97	43	6	0	0	53	4
0	3	6	3	9	94	8*	5	0	0	4	0	12	26		7	35	48	41	82	0	0	43	3
0	13	21	2	11	79	4	7	3	2*	0	0	5	26	22	6	38	93	57	83	0	0	73	4
0	0	1	24	86	19	6	3	4	0	23	6	2		41	13	42	69	34	59	0	0	15	33
0	1	8	22	45	46	6	17	2	0	4	11	35	0	17	38	55	45	53	64	0	0	8	39
0	0	11	2	47	38	11	93	0	0	39	2	15	1	62	32	27	51	69	52	0	0	22	13
7	0	13	0*	55	47	23	18	0	35	4	3	2	1	58	45	62	7	71	71	0	0	19	28
0	7	6			23	74	5		4	2	1	3	0	35	56	89	16	63	78	0	0	5	9
2	0	14	5		35	53	9		0*	5	0	4	4	38	0	65	54	65	51	0	0	0	13
		34	2		59	2	0		0	7		26	1	19	0	45	72	72	63		0	15	10
		12	9		45	1	0		0	26	2	4	0	26	5	42	65	55	28	2	0	2	11
		0	3			26	1		0		0	6	1	32	2	28	46		12	1		65	13
		6	3			72	0		0	7	0	1	0	24	21	45	97	86	52	2	14	62	4
		17	55				1			2	1	5	0	23	26	11	94	41	73	1	0	7
		5	0				9			34	13	2	0	13	22		63	35	18	15	28	8	12
		16	4							68	8	4	0	15	24		9	45	64	3	2	38	55
		45	4							5	48	13	2	24	22		38	19	67	0	4	21	13
		83	9							3	74	5	0	23	27		7	48	46	0	0		0
			2							67	0	12	23	53	94		71	6	72	1	0	52	11
			1							63	0	8	6	34	77		27	1	66	0	6	62	18
			9							1	0	11	0	62	3			52	76	1	9	34	4
			2							3	0	3	0	54	13		96	63	15	1	0	8	12
			0							58	2	0	1	26	88		91	37	45	6	0	23	9
			1							8	1	1	0	72	49		32	32		2	1	18	6
			0							0	21	9	1	61	36		83	89	72	0	0	23	15
			0							6	26	4	1	52	35		13	82	38	0	0	9	48
			3							55	0	1	12	92	31		31	36	15	0	0	65	0
			0							22	0	0	0	55	16		68	45	74	0	0	32	0
										15	12	2	13	21	11		27	52	14	5	0	8	23
										16	26	3	5	51	14		68	47	14	0	0	26	5
										68		5	1	5	54		15	15	22	0	0	16	2
										16		16	0	18	32		57	29	17	0	0	9	2
												1	3	24	4		83		72	12	0	6	34
												4	1	79	11		13	42	91	6	0	11	14
												4	2	76	9		41	84	43	1	0	17	45
												3	1	53	14		96	51	22	0	0	17	26
												3	0	38	9		99	85	28	0	0	49	11
												3	1	62	5			23	23	0	0	51	5
												2	0	7	4			16	58	0	0	2	0
												5	1	1	12			67	35	0	0	7	0
													1	18	9			35	9	16	0		9
													0	11	9			68	22	42	0	67	7
													36	79				92	19	2	0	16	17
													15	74				8	7	4	0	13	3
													0	45				16	15	23	1	15	0
													0	76					36	3	13	17	0
													2						5	1	18	23	9
													0						3	0	0	19	2
													0						67	2	0	54
													9						38	5	1	4	48
													0						76	0	0	13	19
													0						37	0	0	5	9
													1						45	0	0	26	45
													0						56	0	0	37	8
													0							38	5	4	0
													0						58	6	0	3	11
													1						26	32	0	4	0
													0						77	4	0		6
													4						61	0	0		0
													0						95	0	0
													0						92	3	0
													1						78	12	2
													0						71	0	0
													0						84	0	0
													0						79		0
													0							0	0
													6							0	0
													15							9	0
																				0	0
																					1
																					0
																					0
																					0
																					0
																					0
																					0
																					0
																					0
																					0
																					0
																					0
																					0
																					0
																					2
																					0
																					0
																					0
																					0
																					0
																					0
																					0
																					3
																					8
																					3
																					2
																					0
