# Supplementary material for: Cell competition removes segmental aneuploid cells from Drosophila imaginal disc-derived tissues based on ribosomal protein gene dose
Source: eLife. 2021 Apr 13;10:e61172. doi: 10.7554/eLife.61172 (PMC8043752; doi:10.7554/eLife.61172)
Supplement: Figure 7—source data 1. — * Indicates that 4x w+ cells indicative of FLP-mediated duplication were also observed in this specimen. Gaps between measurements separate replicate data. [file elife-61172-fig7-data1.xlsx]

## Sheet: Sheet1
Figure 7 Source Data File 1. % eye white data. * indicates that 4x w+ cells indicative of FLP-mediated duplication were also observed in this specimen
gaps between measurements separate replicate samples
26A1-28C3	26A1-28C3	26A1-28C3	26A1-28C3	26A1-29F8	26A1-29F8	26A1-29F8	26A1-29F8	56F16-58E2	56F16-58E2	56F16-58E2	56F16-58E2	56F16-59B1	56F16-59B1	56F16-59B1	56F16-59B1	56F16-58E2	56F16-58E2	56F16-58E2	56F16-58E2	56F16-59B1	56F16-59B1	56F16-59B1	56F16-59B1
FRT82	FRT82	FRT82 Xrp1	FRT82 Xrp1	FRT82	FRT82	FRT82 Xrp1	FRT82 Xrp1	FRT82	FRT82	FRT82 Xrp1	FRT82 Xrp1	FRT82	FRT82	FRT82 Xrp1	FRT82 Xrp1	FRT80	FRT80	rpS12* FRT80	rpS12* FRT80	FRT80	FRT80	rpS12* FRT80	rpS12* FRT80
male	female	male	female	male	female	male	female	male	female	male	female	male	female	male	female	male	female	male	female	male	female	male	female
4	0	2	6	0	0	0	0	81	29	22	15	2	0	36	34	63	53	27	9	0	0	0	0
6	0	9	2	5	0	4	0	52	43	7	12	0	0	45	0	32	55	18	22	0	0	11	0
2	0	11	2	5	0	45	0	63	38	11	21	0	0	0	0	26	58	23	46	0	0	5	0
16	0	17	4	9	0	4	7	41	21	45	13	0	0	4	0	21	53	43	52	0	0	6	0
13	0	18	36	12	0	28	0	45	57	36	38	0	0	0	5	15	31	36	29	0	0	9	7
4	4	19	34	4	0	0	14	53	16	56	78	0	0	0	28	81	16	23	13	0	0	15	0
41	6	4	27	9	0	11	4	13	71	35	56	0	0	5	5	56	32	26	62	0	0	2	0
17	11	0	5	4	0	9	3	55	46	26	36	0	0	5	2	47	21	8	48	0	0	4	0
6	0	23	16	5	0	0	6	32	31	37	31	0	0	47	3	45	31	54	73	0	0		0
0	9	27	12	16	0	2	3	17	29	29	82	0	0	13	3	55	38	26	74	0	0	1	0
3	5		9	0	0	19	15	3	34	41	18	0	0	15	23	47	54	6	44	0	0	0	5
3	0	13	9	6	0	14	4	17	4	52	12	0	0	0	0	82	12	0	42	0	0	5	12
6	9	19	9		0	2	5	2	68	14	67	0	0	0	0	55	35	32	6	0	0	1
0	0	6	17	0	0	18	6	0	44	12	63	0	0	2	0	65	44	29	73	0	0	0	2
9	2	2	9	8	5	32	13	16	27	3	62	0	0	9	4	65		12	26	0	0	1	1
23	2	28	8	9	2	34	0	14	28	13	15	0	0	13	1	6	57	11	58	0	0	5	2
21	0	8	12	14	0	23	27	65	71	32	34	0		2	0	35	56		61	0	0	8	1
17	1	18	8	5	0	0	32	52	73	44	47	0	0	0	0	32	52	87	32	0	0	11	2
2	2	13	2	0	0	0	9	18	41	59	64		0			52	45	24	18	0	0	3	31
14	2	18	0	6	0	24	0	68	16	65	42	0	0	29	0	48	23	74	24	0	0	13	1
5	45	27	7	3	0	4	0	28		46	57	0	0	42	0	77	65	49	16	0	0	5	0
1	1	21	12	6	0	1	0	65	16	9	41	0	0	8	0	26	23	71	72	0	0	1	7
12	1	2		5		4	0	6	11	87		0	0	3	0	28	12	16		0	0	0	5
2	2	24	6	3	0*	0	2	5	6	89	68	7	0	0	0	99	86	33	16	0	0	15	7
5	34	47	15	9	4	8		13	3		42	0*	0	5	0	65	17	79	41	0	0	31	0
28	2	24	4		0	35	0	64	17	67	47	0	0		0	72	46		4	0	0	3	1
15	1	1	2		0	37	0	8	24	53	3	0	0		0	64	74		11	0	0	3	0
13	4	37	65		0	17	0	35	15	62		0	0		0	32	14		0	0	0	4	4
9	1	45	45		0	0	3	68	5	67		0	0		0	18	4		0	0	0	11	1
17	1	2	42		4	32	3	36	62			0	0		0	8	23		15	0	0	3	0
0	4	7	0		13		0		71			0	0		2	35	36		9	0	0	4	0
0	1		3		0	24	1	23	5			0				28	68		85	0	0	39	0
	4	2	7		0	8	2	35	11			0				26	62		7	0	0	35	0
14	3	12	53		0	19	0	8				0				17	15		47	0	0	13	0
7	5	0	42		0	6	0	24				0				65	89		38	0	0	3	0
3	5	0	2		0	23	2	61								23	17		1	0	0	2	0
2	23	4	4		0	38	16	88								38	15		3	0	0	0	0
17	26	3	6		4	41	35	85								35	64		68	0	0	12	0
14	2	0	64		0	11	45	72								36	63		34		0	8	0
15	0	0	5		0	9	0									91	21			0	0	31	0
6*		56	24		0	0	3									32	26			0		4	0
1	3*	11	12			5	19									45	18			0	0	5	0
14	0	85	15			16	8									14	44			0	0	9	0
2	6	34	32			36										13				0	0	1	0
6	4	6	26			45										26	0			0	0	0	0
19	7	0				9										23	31			0	0	3
0	2	65	0			3										4	61			0	0	2	0
8	24	42	0			6										28	21			0	0	4	0
21	2	55	2			4										13	12			0	0	3	17
9	46	2	26			14										9	9			0	0	3	5
5	27		0			29										31	8			0	0	2	0
35	19		0			2										34	14			0	0	3	0
5	55		28			6										3	62			0	0	51	0
8	14		5													7	34			0	0	14	0
3	8		12														99			0	0	11	0
	0		0													67	27			0	0	12	0
	0		2													26	34			0	0	11	3
	68		4													23	5			0	0		0
	14		24													24	89			0	0	0	1
			45													34	41			0	0	4	2
			0													14	65			0	0	4
			2													93	51			0	0	11
			0													52				0	0	0
			0													68				0	0	0
			0													78				0	0	1
			0													17				0	0	0
			0													68				0	0	6
			0													76				0	0	4
			0													79				0	0
			0													7				0	0
			0													17				0	0
			0													26				0	0
			4													7				0	0
			5													94				0	0
																81				0	0
																				0	0
																15				0	0
																32				0	0
																4				0	0
																86				0	0
																6				0	0
																38				0	0
																55				0	0
																82				0	0
																88				0	0
																92				0	0
																64				0	0
																63				0	0
																63				0	0
																56					0
																22				0	0
																56				0	0
																54				0	0
																41				0	0
																36				0	0
																84				0	0
																				0	0
																				0
																					0
																					3
																					0
																					0
																					0
																					0
																					0
																					0
																					0
																					0
																					0
																					0
