# Supplementary material for: Cell competition removes segmental aneuploid cells from Drosophila imaginal disc-derived tissues based on ribosomal protein gene dose
Source: eLife. 2021 Apr 13;10:e61172. doi: 10.7554/eLife.61172 (PMC8043752; doi:10.7554/eLife.61172)
Supplement: Figure 8—source data 1. — * Indicates that 4x w+ cells indicative of FLP-mediated duplication were also observed in this specimen. Gaps between measurements separate replicate data. [file elife-61172-fig8-data1.xlsx]

## Sheet: Sheet1
Figure 8 Source Data File 1. % eye white data. * indicates that 4x w+ cells indicative of FLP-mediated duplication were also observed in this specimen
gaps between measurements separate replicate samples
48B2-50C1	48B2-50C1	48B2-50C1	48B2-50C1	48F6-50C1	48F6-50C1	48F6-50C1	48F6-50C1	87B8-89B16	87B8-89B16	87B8-89B16	87B8-89B16	87B8-89E5	87B8-89E5	87B8-89E5	87B8-89E5	87B8-93A2.2	87B8-93A2.2	87B8-93A2.2	87B8-93A2.2	89B13-93A2.1	89B13-93A2.1	89B13-93A2.1	89B13-93A2.1	89B13-93A2.2	89B13-93A2.2	89B13-93A2.2	89B13-93A2.2
FRT82	FRT82	FRT82 Xrp1	FRT82 Xrp1	FRT82	FRT82	FRT82 Xrp1	FRT82 Xrp1	FRT82	FRT82	FRT82 Xrp1	FRT82 Xrp1	FRT82	FRT82	FRT82 Xrp1	FRT82 Xrp1	FRT82	FRT82	FRT82 Xrp1	FRT82 Xrp1	FRT82	FRT82	FRT82 Xrp1	FRT82 Xrp1	FRT82	FRT82	FRT82 Xrp1	FRT82 Xrp1
male	female	male	female	male	female	male	female	male	female	male	female	male	female	male	female	male	female	male	female	male	female	male	female	male	female	male	female
0	0	0*	0	26	47	42	52	0	2	16	42	2	0	13	35	0	0	8	14	0	9*	7	15	28	18	4*	7
0	0	0	0*	18	42	26	26	0	0	37	24	0	3	2	4	6	0	0	14	4	8	12	28	12	9	4	13
1	0	0	0	6	23	21	17	0	3		18	0	0	14	2	2	0	3	0	21	22	24	11	4*	3	11	7
0	0	0	1	14	24	26	14	0	2	26	8	0	0	0	6	2	0	13	7	2	8	4	16	16	2	8	2*
0	0	2*	2	36	24	27	74	0	11	19	27	1	5	45	4	0	0	7	7	21	2	8	7	3	4	22	4
0	0	0	2*	26	36	19	11	0	4	23	5	0	0	5	3	0	0	2	0	8	5	2	17	32	4	9	8
0	2	2	0		12*	23	8		24	18	5	2	0	15		8	2	6	8	11	3	4	4	11	23	6	1
0	0*	1	2*	7	6	21*	13	4	18	5	5	0	0	7	6	6	1	6	8	19	2*	6	18	9	1	7	1
0	0	0*	6*	9	26	7	68	0	0	4	41	0	3	12	3	1	0*	14	0	4	24*	14	9	18	2	1	2
0	0*	1	4	8	5	42	82	5	3		15	1	2	28	4	1	8	5	0	7	6	15	8	0*	24	2	1
0	0	0	3	28	26	21*	12	1		3	64		0	4	3	0	0	5	0	4	3	27	13	16	6	3	14
0	0	0	0	7*	6	17	13	1	0	1	61	0	0	6	17	0	0	0	0	7	5	31	7	15	4	9	15
1	2	0*	5*	16*	27	35	26	1	0	68	38	0	7		27	4	0	0	2	11	5	3*	6	9*	9	8	16
1	0	0*	2*	16*	28	18*	8		0	19	8	0	4	11	3	0	1	4	4	5	15	7*	4	11*	4*	12	6
0	0	2		34*	34				2	4		3	0	4	6	3	0	6	6	0	8	21	4	6	3	17	3
0	0	2*		15	35	16	24		2	9	14	0	0	38	2	1	0	8	3	3	16	14	2	9	2	3*	5
				9*		53	17		0		21	3	3	45	0
					67	61	23		2		34	2	0	14	7	2	0	9	0	4	23	12	9*	6*	56	31	2
				19*	45	6	81		0		31	0	0	16	9	6	4	12	0	1	12	5	8	1*	37	19	0
				12*	28	23*	54		3		16	0		32	17	2	0	5	3	5	35	0	22	11	12	6	2
				11	38	8*	29		0		0	0	19	21	5	8	0	3	3	6	9	5	8	8	22	21	6
				27	21	19*	53		1		22	4	8	26	8	8	2	18	23	1*	5	6	2	4	32	12	5
				5	41	41*	72		0		13	2	3	28	6	4	0	16	14	2	8	7	5	5	2*	16	0
				14	35	14*	38		0		32	3	5	4	4	0	5	3	2	4	9	4*	3	12	4	3	2
				17*	11	12	84		0		41	3	0	9	3	0	2	2	2	3	7	28	2*	19	6*	0	1
				26*		68*	65				9	1	0	12	6	0	0	0	6	7	0	17	24*	14	13	2	18
				6*	9	13*	85				11	0	0	56	2	1	0	2	13	14	1	18	6	9	17*	24*	11
				12*	36	14	23				4	2	1	2	1	0	8	0	3	8	1	7*	3	4	1	3*	0
					96	12	35				4	0	1	4	0	21	15	0	7	9	1	1	5	22	0	11	3
				5	53	4*	34					2	1	34	32	4	0	4	0	17	4	16	5	8	2	6	4*
				65	21	14*	64				68	0	9	26	15	5	0	2	0	9	5	27	15	12*	3	5*	6
				23	19						71	2	6	1	2	0	0	4	3	5	9	3	8	0	16	15
				13	57						13	1	0	1	0	0	0	2	0	2	7	17	16	9	16	3
				2*	6						5	2	4	2	0
				45*	86						44	0	0	2	2
				5	77						21	1	2	2	0
				46	18						6	0	1	4	6
				7	12						4	0	2	4	3
				6							17	0	9	11	7
				22	4						68	0	6	5	2
				12*	14						6	0	1	2	3
				4	24						12	0	0	4	16
				7	14							2	0	11	15
				4*	65							0	0		3
				1	8							0	0		7
					6							1	0		2
					72							2	0		3
					24							1	1		32
					57							2	0		6
					64								0		13
					78							7	0		8
					16							4	1		12
					43							0	0		22
												0	1		3
												1	0		0
												0	0		2
												2	0		4
												6	0
												2	1		5
												4	2		3
												1	0		2
												0	2		2
												3	2
												0	4
												0	0
												0	0
												0	0
												0	0
												0	0
												1	2
												0	0
												1	0
												0	0
												0	0
													1
													11
													15
													6
													0
													0
													0
													0
													8
													3
													0
													3
													1
													0
													2
													0
													0
													2
													1
													1
													0
													0
													0
													0
													0
													0
													5
													2
