# Supplementary material for: Cell competition removes segmental aneuploid cells from Drosophila imaginal disc-derived tissues based on ribosomal protein gene dose
Source: eLife. 2021 Apr 13;10:e61172. doi: 10.7554/eLife.61172 (PMC8043752; doi:10.7554/eLife.61172)
Supplement: Figure 9—source data 1. — * Indicates that 4x w+ cells indicative of FLP-mediated duplication were also observed in this specimen. Gaps between measurements separate replicate data. [file elife-61172-fig9-data1.xlsx]

## Sheet: Sheet1
Figure 9 Source Data File 1. % eye white data. * indicates that 4x w+ cells indicative of FLP-mediated duplication were also observed in this specimen
gaps between measurements separate replicate samples
26A1-29F8	26A1-29F8	26A1-29F8	26A1-29F8	48B2-50C1	48B2-50C1	48B2-50C1	48B2-50C1	56F16-59B1	56F16-59B1	56F16-59B1	56F16-59B1	63A3-65A9	63A3-65A9	63A3-65A9	63A3-65A9	63A3-65F5	63A3-65F5	63A3-65F5	63A3-65F5	63A3-67B2	63A3-67B2	63A3-67B2	63A3-67B2	63C1-65F5	63C1-65F5	63C1-65F5	63C1-65F5	63C1-67B2	63C1-67B2	63C1-67B2	63C1-67B2	87B8-93A2.2	87B8-93A2.2	87B8-93A2.2	87B8-93A2.2	89B13-93A2.1	89B13-93A2.1	89B13-93A2.1	89B13-93A2.1	26A1-28C3	26A1-28C3	26A1-28C3	26A1-28C3	48F6-50C1	48F6-50C1	48F6-50C1	48F6-50C1	56F16-58E2	56F16-58E2
FRT82	FRT82	FRT82 M(3R)95C	FRT82 M(3R)95C	FRT82	FRT82	FRT82 M(3R)95C	FRT82 M(3R)95C	FRT82	FRT82	FRT82 M(3R)95C	FRT82 M(3R)95C	FRT82	FRT82	FRT82 M(3R)95C	FRT82 M(3R)95C	FRT82	FRT82	FRT82 M(3R)95C	FRT82 M(3R)95C	FRT82	FRT82	FRT82 M(3R)95C	FRT82 M(3R)95C	FRT82	FRT82	FRT82 M(3R)95C	FRT82 M(3R)95C	FRT82	FRT82	FRT82 M(3R)95C	FRT82 M(3R)95C	FRT82	FRT82	FRT82 M(3R)95C	FRT82 M(3R)95C	FRT82	FRT82	FRT82 M(3R)95C	FRT82 M(3R)95C	FRT82	FRT82	FRT82 M(3R)95C	FRT82 M(3R)95C	FRT82	FRT82	FRT82 M(3R)95C	FRT82 M(3R)95C	FRT82	FRT82
male	female	male	female	male	female	male	female	male	female	male	female	male	female	male	female	male	female	male	female	male	female	male	female	male	female	male	female	male	female	male	female	male	female	male	female	male	female	male	female	male	female	male	female	male	female	male	female	male	female
0	0	1	42	0	0	0	6	2	0	26	0	0	0	93	58	32	23	65	53	0	0	0	5	5	2	24	38	6	9	11	4	0	0	7	28	0	9*	27	35	4	0	58	26	26	47	4*	94	81	29
5	0	0	28	0	0	0	4	0	0	0	34	0	0	72	56	13	0	54	6	0	0	0	5	0	0	54	43	11	12	5	11	6	0	23	23	4	8	13	52	6	0	56	22	18	42	16	93	52	43
5	0	22	21	1	0	0	0	0	0	0	9	3	5	65	46	7	0	96	27	0	0	11	0	4	16	31	26	0	0	9	0	2	0	28	36	21	22	45	32	2	0	22	27	6	23	19	36	63	38
9	0	32	49	0	0	0	0	0	0	12	0	2	0	67	32	44	0	100	56	0	0	13	34	16	11	72	14	2	0	14	2	2	0	19	35	2	8	8	54	16	0	24	71	14	24	3	31	41	21
12	0	55	23	0	0	0	22	0	0	36	3	13	0	63	23	28	4	100	35	0	0	35	37	5	4	15	43	1	0	3	12	0	0	54	12	21	2		55	13	0	71	36	36	24	54	24	45	57
4	0	72	11	0	0	0	3	0	0	13	0	5	31	61	95	23	5	100	34	0	0	2	32	0	27	9	53	0	0	19	26	0	0	11	16	8	5		22	4	4	18	36	26	36	52	4	53	16
9	0	12	31	0	2	0	0*	0	0	28	0	2	12	45	37	0	2	23	83		0	43	43	18	15	42		1	0	5	0	8	2	19	56	11	3		23	41	6	27	78		12*	5	5	13	71
4	0	17	81	0	0*	0	0	0	0	0	0	1	2	68	53	1	0	48	27		0	3	2	0	2	26	24	0	0	3	0	6	1	9	34	19	2*		12	17	11	26	16	7	6	1	28	55	46
5	0	53	37	0	0	0	2	0	0	0	0	1	16	32	65	27	2	61	28		0	12	11	42	0	65	44	0	0	38	5	1	0*		14	4	24*		22	6	0	65	14	9	26	6*	37	32	31
16	0	26	43	0	0*	0	8	0	0	0	0	35	45	69	68	68	0	5	38		0	6	0	0	0	14	42	0	0	9	32	1	8		5	7	6		78	0	9	48	37	8	5	0*	44	17	29
0	0	35	11	0	0	0	13*	0	0	16	2		5	95	15	9	3	82	68		0	62	3	0	0	42	16	0	0	9	27	0	0		11	4	3		31	3	5	36	46	28	26	26	42	3	34
6	0	28	26	0	0	0	0	0	0	0	0	13	4	83	55	7	0	81	43		0	14	68	0	0	65	35	41	0	18	9	0	0		68	7	5		41	3	0	65	32	7*	6	5	54	17	4
	0	36	17	1	2	0	5*	0	0	0		12	26	58	71	32	0	100	44		0		8	0	0	63	62	0	0	0	17	4	0		38	11	5		28	6	9	47	79	16*	27	18	6*	2	68
0	0	41	31	1	0	0	3	0	0	0	44	5	26	72	53	4	0	100	37		0	11	0	0	0	85	46	0	4	0	5	0	1		4	5	15		72	0	0	36	42	16*	28	96	83	0	44
8	5	39	5	0	0	0	2	0	0	0	24	2		100	21	5	0	99	14		0	0		0	0	65	15	0	0	0	19	3	0		26	0	8		21	9	2	21	44	34*	34	14	14*	16	27
9	2	72	48	0	0	0	4	0	0	2	6	35	0	100	16	26	3	19	13		0	0	22	0	0	76	47	18	0	0	5	1	0		18	3	16		34	23	2	57	15	15	35	4	53	14	28
14	0	95	24					0		7	5	15	1	94	51	0		65	67		0	8	0	0	0	61	57	0	0		1									21	0	54	9	9*				65	71
5	0	86	32			0	4	0	0	0	58	2	1	55	46	16	0	14	53		0	35		0	0	62	67	0	2		4	2	0			4	23			17	1	47	0		67	2	47	52	73
0	0	56	47			0	0*		0	5	19	3	0	65	67	4	0	28	48		0	2		0	0	5	38		0		11	6	4			1	12			2	2	8	45	19*	45	11	24	18	41
6	0	9	76			0	0	0	0	4	0	4	4	62	52	8	0	46	18		0			0	0	2	39	2	0		6	2	0			5	35			14	2	45	64	12*	28	2	56	68	16
3	0	3	43			0	6*	0	0	10	21	26	1	42	78	0	0				0				0	32	4	0	0		16	8	0			6	9			5	45	36	9	11	38	17	72	28
6	0	42	47			0	8	0	0	0	0	4	0	69	82	0	0	13	0		0			2	0	4		2	0		32	8	2			1*	5			1	1	72	12	27	21	2	65	65	16
5		43	19			0	5	0	0	0	6	6	1	41	44	8	0	18	0		0			1		97		0	12		1	4	0			2	8			12	1		52	5	41	6*	56	6	11
3	0*	77	85			0	0	7	0	0	0	1	0	43	24	1	4	28	11		0			2	14	95		0	0		19	0	5			4	9			2	2	65	24	14	35	6	52	5	6
9	4	23	17			0	5*	0*	0	5	3	5	0	95	46		3	34	26		0			1	0			0	0			0	2			3	7			5	34	68	86	17*	11	3	72	13	3
	0	9	8			0	2	0	0	0		2	0	65	41	0	0	24	0		0			15	28	51		0	0			0	0			7	0			28	2	42	43	26*		18	58	64	17
	0	61	65			1	6	0	0	16		4	0	35	55	16	1	22	0		0			3	2	48		0	0			1	0			14	1			15	1	54	11	6*	9	5	36	8	24
	0	39	36			0	6	0	0	17		13	2	83	53	0	0	81	18		0			0	4	48		0	0			0	8			8	1			13	4	77	1	12*	36		47	35	15
	0	14	6			0	13	0	0	0		5	0	66		1	0	78	5		0			0	0	71		0				21	15			9	1			9	1	67	3		96		34	68	5
	4	32	5			0	3	0	0	0		12	23	24	76	5	0	35	14		0			1	0	27		0	0			4	0			17	4			17	1	55	12	5	53		14	36	62
	13	1	42			0	0	0	0	0		8	6	68	86	67	3	23	68		0			0	6	8		0	0			5	0			9	5			0	4	52	7	65	21		21		71
	0	37	43			0	4	0		0		11	0	71	73	42	1	56	52		0			1	9	98		0	0			0	0			5	9			0	1	45	0	23	19		88	23	5
	0	15	16			1	3	0		0		3	0	56	32	4	0	15	2		0			1	0	84		0	0			0	0			2	7				4	56	82	13	57		93	35	11
	0	39	62					0		0		0	1	43	84	28	0	83	22		0			6	0	62		0	0											14	3	6	21	2*	6			8
	0	52	21					0		16		1	0	45	91	8	0	24	45		0			2	1	26		0	0											7	5	35	4	45*	86			24
	0	26	32							13		9	1	8	63	22		51	5		0			0	0			0	0											3	5	31	52	5	77			61
	0	22	38									4	1	62	74	0		23	53		0			0	0			0	0											2	23	11	43	46	18			88
	4	36	42							0		1	12	32	38	1		23			0			0	0			0	0											17	26	26	4	7	12			85
	0	28	53							7		0	0	23	69	24		2						0	0			0	0											14	2	28		6				72
	0	28	13							2		2	13	64	62	6		65						5	0			0	0											15	0	11	13	22	4
	0	15	11							4		3	5	22	68	0		45						0	0			0	0											6*		31	15	12*	14
		5	12							0		5	1	55	64	4		58						0	0			0	0											1	3*	53	43	4	24
		17	13							0		16	0	29	63	1		36						0	0			0	0											14	0	72	22	7	14
		21	0							0		1	3	45	84	15								12	0			0	0											2	6	32	43	4*	65
		11	45							0		4	1	14	91	0								6	0			0	0											6	4	21	34	1	8
		32	4									4	2	38										1	0			0	0											19	7	77	44		6
		59	13									3	1	36	45									0	0			0	0											0	2	45	37		72
		38	23									3	0	77	42									0	0			0	0											8	24	14	67		24
												3	1	63	11									0	0			0	0											21	2	21	27		57
		4	99									2	0	78	6									0	0			0	0											9	46	22	76		64
		12	77									5	1	68	36									0	0			0	0											5	27	67	68		78
		9	99										1	31	65									16	0			0	0											35	19	8	71		16
		21	99										0	64	55									42	0			0	0											5	55	73	64		43
		45	99										36	45	15									2	0			0	0											8	14		74
		23	48										15	47	26									4	0			0	0											3	8	55	67
		26	45										0	16	56									23	1			0	0												0	22	58
		47	0										0	52	35									3	13			0	0												0		56
		82	26										2	31	56									1	18			0	0												68		41
		62	65										0	62	72									0	0			0	0												14		64
		0	21										0	89	87									2	0			0	0														42
		6	17										9		45									5	1			0	0														62
		45	47										0	68	48									0	0			0	0														45
		38	65										0	65	41									0	0			0	0														27
		4	28										1	84	39									0	0				0														4
		68	38										0	65	68									0	0				0														2
		37	9										0	63	91									38	5				0														45
		5	42										0	23	52									6	0				0														9
		26	99										1	82	6									32	0				0														59
		42	99										0	73	36									4	0				0														73
		47	8										4	72	37									0	0				0														4
		82	22										0	53	45									0	0				0														43
		64	0										0	91	72									3	0																		11
		81	0										1	84	81									12	2																		14
													0	35	18									0	0																		87
													0	67	65									0	0																		64
													0	42	38										0																		42
													0	64	74									0	0																		41
													6	55	65									0	0																		45
													15	62	35									9	0																		47
														76	100									0	0																		48
														41	89										1																		64
														65	68										0																		29
														52	49										0																		54
														76	19										0																		64
														85	67										0																		47
														95	57										0																		53
														61	34										0																		18
														53	52										0
														31	68										0																		96
														71	35										0																		86
														94	38										0
															56
														96	14										0
														86	28										0
														35	89										0
														72	31										2
														58	12										0
														36	35										0
														86	64										0
														95	48										0
														38											0
														55											0
														36											0
														63											3
														27											8
														76											3
														87											2
														89											0
														35
														39
														37
														38
														79
														35
														67
														96
														97
														62
														65
														62
														41
														28
														44
														62
														58
														49
														61
														56
														49
														39
														63
														45
														59
														51
														41
														45
														41
														24
[truncated: 14 more columns]
