# Supplementary material for: Cell competition removes segmental aneuploid cells from Drosophila imaginal disc-derived tissues based on ribosomal protein gene dose
Source: eLife. 2021 Apr 13;10:e61172. doi: 10.7554/eLife.61172 (PMC8043752; doi:10.7554/eLife.61172)
Supplement: Figure 10—source data 1. [file elife-61172-fig10-data1.xlsx]

## Sheet: Sheet1
Source Data File 3, related to Figure 10
	Figure 10B			genotype
		56F16-58E2	56F16-58E2	56F16-58E2	56F16-59B1	56F16-59B1	56F16-59B1
			rpS12[97D]	Xrp1[+/-]		rpS12[97D]	Xrp1[+/-]
	Minute bristles/100 flies	0	0	0	0	6	3
		0	0	0	0	10	4
		0	0	0	0	8	5
