# Supplementary material for: Cell competition removes segmental aneuploid cells from Drosophila imaginal disc-derived tissues based on ribosomal protein gene dose
Source: eLife. 2021 Apr 13;10:e61172. doi: 10.7554/eLife.61172 (PMC8043752; doi:10.7554/eLife.61172)
Supplement: Supplementary file 1. — Columns indicate the specific insertion, genome location, and cytological position of the elements used as the left FRT site. Rows indicate the same information for the right FRT site. Insertions in the ‘d’ family are of the P{XP} element, the ‘e’ family the PBac{RB} element, and ‘f’ family PBac{WH} (Thibault et al., 2004). For clarity, in the main text we refer to genetic strains by the cytological insertion point eg ‘63A3-65A9’ is the shorthand descriptive name for the PBac{WH}f01922 P{XP}d02570 chromosome. Which Rp genes are included between FRT sites is shown, as is eIF2γ. Some FRT combinations were poor substrates for Flp, either retained the parental eye color in the presence of eyFlp, or produce a salt and pepper pattern of very small clones that is indicative of excision occurring only late in development once large cell numbers are present (Figure 2U–Z). These results are summarized by shading FRT combinations tested as follows: Green – eyFlp recombination in essentially all cells; Blue – eyFlp recombination in most cells, associated with small eye size (≤0.5 linear dimensions); magenta – eyFlp recombination not detected; Orange – eyFlp recombination only late in development gives a mottled eye. The interpretation that recombination is reduced or absent is preferred to the alternative possibility that excision results in a cell-lethal genotype that later disappears, in part because results correlated with individual FRT elements and not with the genetic material between them. For example, recombination between 26A1 and 28F3 or 29C1, revealed only small, late recombination, but the 26A1-29F8 recombination that deletes all the same sequences was completely excised from EyFlp eyes and developed normal eye size with entirely Df(2L)26A1-29F8/+ cells (Figure 2D). Other examples of recombinations that could not readily be obtained were 87B8-89B18, 87B8-91B8, 87B8-92F1 and 89B13-92F1, although the larger 89B8-93A2 and 89B13-93A2 recombinations were readily obtained [file elife-61172-supp1.xlsx]

## Sheet: Sheet1
insertion			e00462	f04180	d08241	d09761	d09417	d02302
	location		2L:206,074	2L:473,071	2L:5,923,740	2R:11,646,107	2R:12,306,494	2R:20,306,586
		cytology	21B4	21D1	26A1	48B2	48F6	56F16
d07944	2L:2,670,580	23A2	RpLP1
d06074	2L:3,580,955	24A1		RpS21
f04888	2L:7,780,729	28C3
e02272	2L:8,211,772	28F3			RpL36A
e03937	2L:8,400,900	29C1			RpL36A, RpS13
f00857	2L:9,025,734	29F8			RpL36A, RpS13
f00157	2R:13,667,267	50C1				RpS11
e00535	2R:14,157,500	50E1				RpS11
e03998	2R:14,514,558	50E1				RpS11, RpS23	RpS23
f04349	2R:22,466,635	58E2
f00464	2R:22,791,817	59B1						RpS16, RpS24
insertion			f01922	f05041	d06455	d05983	d06796	d06928
	location		3L:3,042,585	3L:3,239,721	3R:10,889,314	3R:11,200,398	3R:12,372,864	3R:16,351,726
		cytology	63A3	63C1	86C7	86D7	87B8	89B13
d02570	3L:6,218,125	65A9	RpL28
d02813	3L:7,334,986	65F5	RpL28, RpL18	RpL18
d07256	3L:9,358,902	67B2	RpL28 RpL18 RpL14	RpL18, RpL14
f04937	3R:16,442,926	89B16					eIF2g
e03186	3R:16,485,326	89B18					eIF2g
f00971	3R:16,977,724	89E5					eIF2g
e03728	3R:18,648,278	91B8					eIF2g
e03144	3R:20,553,508	92F1			RpS25, eIF2g	RpS25, eIF2g	eIF2g
f03502	3R:20,864,109	93A2					eIF2g RpS20 RpS30	RpS20, RpS30
f01700	3R:20,873,002	93A2					eIF2g RpS20 RpS30	RpS20, RpS30
