# Supplementary material for: Cell competition removes segmental aneuploid cells from Drosophila imaginal disc-derived tissues based on ribosomal protein gene dose
Source: eLife. 2021 Apr 13;10:e61172. doi: 10.7554/eLife.61172 (PMC8043752; doi:10.7554/eLife.61172)
Supplement: Supplementary file 2. — 109 pairwise comparison between segmental aneuploid genotypes were performed in this study, which requires multiple testing correction. The table shows each comparison ranked according to raw p-value (Mann-Whitney), Benjamini-Hochberg critical value for FDR ≤ 0.05, adjusted p-value, and significance. [file elife-61172-supp2.xlsx]

## Sheet: Sheet1
Rank	ID	Original P value	Critical Value	Benjamini-Hochberg Adjusted P value	Significant using an FDR of 0.05?
1	63A3-65A9f-63A3-65A9Mf	5.83e-28	0.000458716	6.3547e-26	Yes
2	56F16-59B1m-56F16-59B1s12m	3.43e-27	0.000917431	1.86935e-25	Yes
3	63A3-65A9m-63A3-65A9Mm	9.55e-25	0.00137615	3.46983e-23	Yes
4	63C1-65A9f-63C1-65F5f	1.85e-24	0.00183486	5.04125e-23	Yes
5	63C1-65A9f-63C1-67B2f	3.64e-23	0.00229358	7.9352e-22	Yes
6	63C1-65A9m-63C1-67B2m	1.58e-21	0.00275229	2.87033e-20	Yes
7	63C1-65A9m-63C1-65F5m	2.61e-20	0.00321101	4.06414e-19	Yes
8	63C1-65A9f-63A3-65A9f	5.2e-18	0.00366972	7.085e-17	Yes
9	63C1-65F5f-63C1-65F5Xf	2.04e-17	0.00412844	2.47067e-16	Yes
10	63C1-65F5m-63C1-65F5Xm	1.33e-16	0.00458716	1.4497e-15	Yes
11	26A1-29F8f-26A1-29F8Mf	1.59e-16	0.00504587	1.57555e-15	Yes
12	63C1-65A9f-63A3-67B2f	1.71e-16	0.00550459	1.55325e-15	Yes
13	26A1-29F8m-26A1-29F8Mm	1.97e-16	0.0059633	1.65177e-15	Yes
14	63C1-65A9m-63A3-65A9m	8.23e-16	0.00642202	6.40764e-15	Yes
15	63C1-65F5f-63C1-65F5Mf	1.65e-15	0.00688073	1.199e-14	Yes
16	63A3-65A9m-63A3-65A9Xm	3.93e-15	0.00733945	2.67731e-14	Yes
17	26A1-28C3m-26A1-28C3Mm	9.07e-15	0.00779817	5.81547e-14	Yes
18	63C1-65F5m-63C1-65F5Mm	9.15e-15	0.00825688	5.54083e-14	Yes
19	87B8-89E5m-87B8-89E5Xm	1.95e-14	0.0087156	1.11868e-13	Yes
20	63C1-65A9f-63A3-65F5f	3.61e-14	0.00917431	1.96745e-13	Yes
21	26A1-28C3f-26A1-28C3Mf	4.21e-14	0.00963303	2.18519e-13	Yes
22	63C1-67B2f-63C1-67B2Mf	4.48e-14	0.0100917	2.21964e-13	Yes
23	48B2-50C1f-48B2-50C1Mtotf	5.9e-14	0.0105505	2.79609e-13	Yes
24	56F16-58E2m-56F16-59B1m	1.44e-13	0.0110092	6.54e-13	Yes
25	63A3-65A9f-63A3-65A9Xf	2.09e-13	0.0114679	9.1124e-13	Yes
26	87B8-89E5m-87B13-93A2.2m	5.05e-13	0.0119266	2.11712e-12	Yes
27	63A3-65A9f-63A3-65A9+RpL28+f	6.61e-13	0.0123853	2.66848e-12	Yes
28	56F16-58E2f-56F16-59B1f	7.31e-13	0.012844	2.84568e-12	Yes
29	87B8-89E5f-87B8-89E5Xf	4.13e-11	0.0133028	1.55231e-10	Yes
30	63C1-65A9m-63A3-65F5m	5.33e-11	0.0137615	1.93657e-10	Yes
31	87B8-89E5m-87B13-93A2.1m	6.53e-11	0.0142202	2.29603e-10	Yes
32	87B8-89E5f-87B13-93A2.1f	9.76e-11	0.0146789	3.3245e-10	Yes
33	87B8-89E5-87B8-89E5+eIF2gf+	1.86e-10	0.0151376	6.14364e-10	Yes
34	56F16-59B1f-56F16-59B1s12f	2.17e-10	0.0155963	6.95676e-10	Yes
35	87B8-89E5f-87B13-93A2.2f	2.84e-10	0.016055	8.84457e-10	Yes
36	63A3-65F5f-63A3-65F5Mf	1.67e-09	0.0165138	5.05639e-09	Yes
37	48B2-40C2f-48F6-50C1f	1.88e-09	0.0169725	5.53838e-09	Yes
38	63A3-67B2m-63A3-67B2Mm	3.18e-09	0.0174312	9.12158e-09	Yes
39	48B2-40C2m-48F6-50C1m	5e-09	0.0178899	1.39744e-08	Yes
40	63A3-65F5fm- 63A3-65F5Mm	8e-09	0.0183486	2.18e-08	Yes
41	63A3-65A9m-63A3-65A9+RpL28+m	8.78e-09	0.0188073	2.3342e-08	Yes
42	26A1-28C3f-26A1-29F8f	1.47e-08	0.0192661	3.815e-08	Yes
43	87B8-93A2f-87B8-93A2Mf	1.85e-08	0.0197248	4.68953e-08	Yes
44	56F16-59B1m-56F16-59B1Xm	2.26e-07	0.0201835	5.59864e-07	Yes
45	63C1-67B2m-63C1-67B2Mm	3.79e-07	0.0206422	9.18022e-07	Yes
46	89B13-93A2.1f-89B13-93A2.1Mf	4.2e-07	0.0211009	9.95217e-07	Yes
47	87B8-89E5m-87B8-89E5Mm	1e-06	0.0215596	2.31915e-06	Yes
48	87B8-87B16m-87B8-87B16Xm: Nov	3e-06	0.0220183	6.8125e-06	Yes
49	87B8-87B16f-87B8-87B16Mf: Nov	3e-06	0.0224771	6.67347e-06	Yes
50	56F16-59B1f-56F16-59B1Mf	6e-06	0.0229358	1.308e-05	Yes
51	87B8-89B16m-87B13-93A2.2m	1.1e-05	0.0233945	2.35098e-05	Yes
52	26A1-29F8f-26A1-29F8Xf	1.5e-05	0.0238532	3.14423e-05	Yes
53	87B8-89E5f-87B8-89E5Mf	2.1e-05	0.0243119	4.31887e-05	Yes
54	87B8-89B16-87B8-89B16+eIF2g+	3.6e-05	0.0247706	7.26667e-05	Yes
55	63A3-65F5f-63A3-65F5Xf	4.1e-05	0.0252294	8.12545e-05	Yes
56	87B8-93A2m-87B8-93A2Mm	4.1e-05	0.0256881	7.98036e-05	Yes
57	63C1-67B2m-63C1-67B2Xm	4.1e-05	0.0261468	7.84035e-05	Yes
58	63C1-65A9m-63A3-67B2m	6.8e-05	0.0266055	0.000127793	Yes
59	87B8-87B16f-87B8-87B16Xf: Nov	0.000102	0.0270642	0.000188441	Yes
60	63A3-65A9m-63A3-65A9H99m	0.000143	0.0275229	0.000259783	Yes
61	63C1-65F5m-63C1-65F5H99m	0.000163	0.0279817	0.000291262	Yes
62	56F16-59B1m-56F16-59B1Mm	0.000187	0.0284404	0.000328758	Yes
63	56F16-59B1f-56F16-59B1Xf	0.000313	0.0288991	0.00054154	Yes
64	48B2-50C1f-48B2-50C1Xtotf	0.000341	0.0293578	0.000580766	Yes
65	87B8-89B16f-87B8-93A2f	0.000439	0.0298165	0.000736169	Yes
66	63C1-65A9f-63C1-65A9H99f	0.000612	0.0302752	0.00101073	Yes
67	63C1-65F5f-63C1-65F5H99f	0.001509	0.0307339	0.00245494	Yes
68	87B8-93A2f-87B8-93A2Xf	0.002556	0.0311927	0.00409712	Yes
69	87B8-89B16f-87B13-93A2.1f	0.002646	0.0316514	0.00417991	Yes
70	63A3-65F5m-63A3-65F5Xm	0.002725	0.0321101	0.00424321	Yes
71	63C1-65A9m-63C1-65A9H99m	0.003178	0.0325688	0.0048789	Yes
72	63A3-67B2m-63A3-67B2Xm	0.003634	0.0330275	0.00550147	Yes
73	63A3-67B2m-63A3-67B2Mm	0.004058	0.0334862	0.00605921	Yes
74	87B8-89B16m-87B13-93A2.1m	0.004636	0.033945	0.0068287	Yes
75	87B8-89B16f-87B13-93A2.2f	0.007291	0.0344037	0.0105963	Yes
76	63C1-67B2f-63C1-67B2Xf	0.011063	0.0348624	0.0158667	Yes
77	89B13-93A2.1m-89B13-93A2.1Mm	0.014367	0.0353211	0.0203377	Yes
78	48F6-50C1m-48F6-50C1Xm	0.015118	0.0357798	0.0211264	Yes
79	48B2-50C1m-48B2-50C1Mtotm	0.019613	0.0362385	0.027061	Yes
80	87B8-89E5m-87B8-93A2m	0.019625	0.0366972	0.0267391	Yes
81	87B8-93A2m-87B8-93A2Xm	0.021765	0.037156	0.0292887	Yes
82	48F6-50C1f-48F6-50C1Mf	0.023889	0.0376147	0.0317549	Yes
83	48B2-50C1m-48B2-50C1Xtotm	0.024827	0.0380734	0.0326041	Yes
84	89B13-93A2.1m-89B13-93A2.1Xm	0.036348	0.0385321	0.0471659	Yes
85	26A1-29F8m-26A1-29F8Xm	0.041284	0.0389908	0.0529407	No
86	48F6-50C1m-48F6-50C1Mm	0.057212	0.0394495	0.0725129	No
87	63C1-65A9m-63C1-65A9Mm	0.071887	0.0399083	0.0900653	No
88	89B13-93A2.2f-89B13-93A2.2Xf	0.075925	0.040367	0.0940435	No
89	26A1-28C3m-26A1-28C3Xm	0.086791	0.0408257	0.106295	No
90	56F16-58E2m-56F16-58E2s12m	0.1006	0.0412844	0.121838	No
91	26A1-28C3f-26A1-28C3Xf	0.136783	0.0417431	0.163839	No
92	26A1-28C3m-26A1-29F8m	0.14865	0.0422018	0.176118	No
93	63C1-65A9f-63C1-65A9Mf	0.155343	0.0426606	0.182069	No
94	56F16-58E2f-56F16-58E2Xf	0.168677	0.0431193	0.195594	No
95	87B8-89B16m-87B8-93A2m	0.179244	0.043578	0.205659	No
96	87B8-89E5f-87B8-93A2f	0.228638	0.0440367	0.259599	No
97	63A3-67B2m-63A3-67B2Xm	0.240983	0.0444954	0.270795	No
98	63A3-65A9f-63A3-65A9H99f	0.26499	0.0449541	0.294734	No
99	56F16-58E2f-56F16-58E2s12f	0.275596	0.0454128	0.303434	No
100	63C1-65A9f-63A3-65A9+RpL28f	0.294581	0.0458716	0.321093	No
101	48F6-50C1f-48F6-50C1Xf	0.310526	0.0463303	0.335122	No
102	89B13-93A2.2m-89B13-93A2.2Xm	0.329238	0.046789	0.351833	No
103	89B13-93A2.1f-89B13-93A2.1Xf	0.384984	0.0472477	0.40741	No
104	56F16-58E2m-56F16-58E2Xm	0.70665	0.0477064	0.740624	No
105	63C1-65A9m-63C1-65A9Xm	0.719199	0.0481651	0.746597	No
106	63C1-65A9m-63A3-65A9+RpL28m	0.941325	0.0486239	0.967966	No
107	56F16-58E2m-56F16-58E2Mm	0.952979	0.0490826	0.970792	No
108	63C1-65A9m-63C1-65A9Xm	0.956944	0.0495413	0.965805	No
109	56F16-58E2m-56F16-58E2Mm	1	0.05	1	No
